# Supplementary material for: Multiplexed actuation using ultra dielectrophoresis for proteomics applications: a comprehensive electrical and electrothermal design methodology
Source: Royal Society of Chemistry journal article supplement (doi:10.1039/c4lc00036f), 2014-01-01
Supplement: c4lc00036f1.pdf [file c4lc00036f1.pdf]

## Supplementary Information for

### Multiplexed Actuation Using Ultra Dielectrophoresis for Proteomics Applications: A Comprehensive Electrical and Electrothermal Design Methodology

Sam Emaminejad<sup>1,2,3</sup>, Robert W. Dutton<sup>1</sup>, Ronald W. Davis<sup>2,3</sup> and Mehdi Javanmard<sup>2,3</sup>

<sup>1</sup> Dept. of Electrical Engineering, Stanford University, Stanford, CA

<sup>2</sup> School of Medicine, Stanford University, Stanford, CA, USA.

<sup>3</sup> Stanford Genome Technology Center, Palo Alto, CA

#### Comparison of the COMSOL simulation vs. 1<sup>st</sup> order model of the electric field

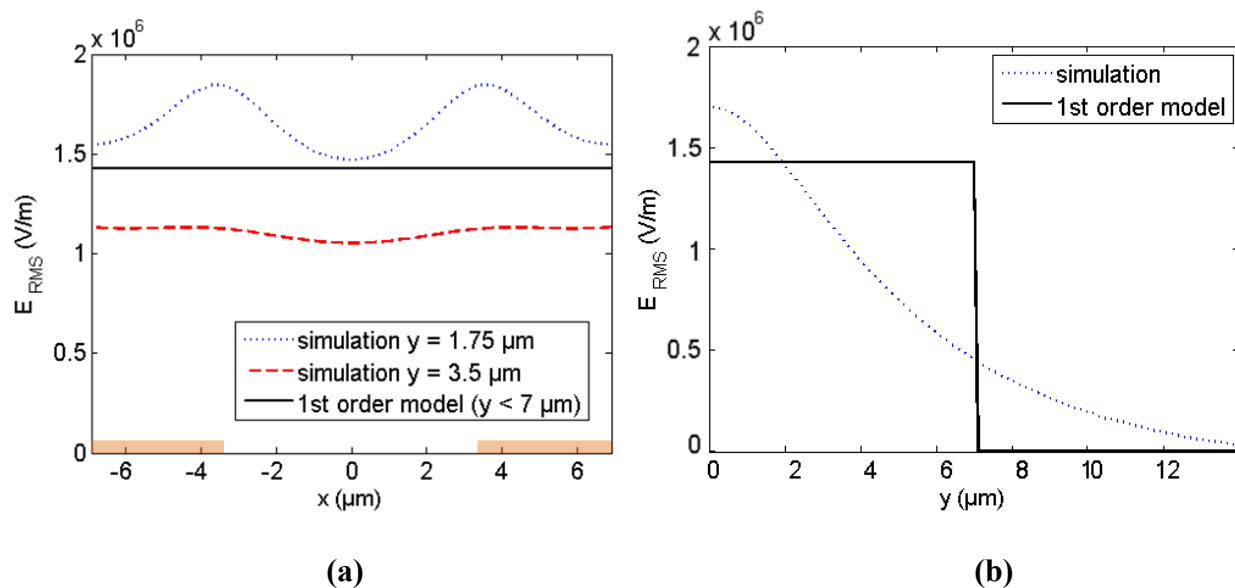

**Figure S1:** Simulated vs. 1<sup>st</sup> order model of the magnitude of electric field for two neighboring electrodes in the IDE (a) along x-axis (half of each electrode is shown) (b) along y-axis at the mid-plane between the two electrodes (assumed the electrodes are  $7 \mu\text{m}$  wide and  $7 \mu\text{m}$  spaced and  $10 V_{RMS}$  is applied at the electrodes).
